# Supplementary material for: An Orphan Problem Looking for Adoption: Responding to Ocean Acidification Utilising Existing International Institutions
Source: Copernicus journal article supplement (doi:10.5194/bg-2017-230), 2017-06-09
Supplement: Supplementary file [file bg-2017-230-RC2-supplement.pdf]

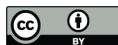

1 **An Orphan Problem Looking for Adoption**  
2 **Responding to Ocean Acidification Utilising Existing International Institutions**

3

4 Ellycia R. Harrould-Kolieb<sup>1</sup>

5 <sup>1</sup>Australian-German Climate and Energy College, University of Melbourne, Melbourne, 3000, Australia

6 *Correspondence to:* Ellycia R. Harrould-Kolieb ([ellycia.harrould@unimelb.edu.au](mailto:ellycia.harrould@unimelb.edu.au))

7

8

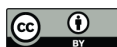

9 **Abstract**

10 Ocean acidification poses a substantial threat to the ocean, marine wildlife and the goods and services they  
11 provide. As a result it presents a substantial regulatory challenge at the international, regional, national and sub-  
12 national levels. In the international realms, ocean acidification is not currently addressed by any international  
13 instrument or stand-alone agreement, nor does there appear to be any coherent framework for responding to the  
14 issue. Despite this, there are a number of international institutions, including treaty bodies and specialised UN  
15 agencies that have expressed an interest in ocean acidification and have begun to initiate an array of relevant  
16 activities – a small number of which may be considered substantive activities, including rule-making and  
17 implementation.

18 This paper is an effort to explore the existing international frameworks that are applicable to forming a response  
19 to ocean acidification in an attempt to prevent worsening acidification and respond to impacts now and into the  
20 future. Six policy domains are outlined that together comprise a comprehensive response to ocean acidification.  
21 Each of these are then addressed with respect to what institutions are currently doing to respond to acidification  
22 and what could be done in the future.

23 This paper finds that only three international institutions have initiated substantive policy-making in response to  
24 ocean acidification with respect to the regulation of carbon capture and storage and the protection of species.  
25 While these are important policy interventions, they are simply not enough to prevent worsening ocean  
26 acidification or respond to the impacts resulting from increased acidity, even when coupled with policies, such  
27 as regulation of carbon dioxide under the UNFCCC that have been implemented without reference to ocean  
28 acidification. In order to fill the existing gaps, this paper proposes a series of, as yet unutilised mechanisms that  
29 could be employed to enhance a response to ocean acidification.

30

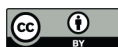

## 31 1. Introduction

32 The problem of ocean acidification is a complex global issue, resulting primarily from the emission of  
33 anthropogenic carbon dioxide (CO<sub>2</sub>) (Doney et al., 2009) and yet, is exacerbated by a myriad of local stressors  
34 (Cai et al., 2011; Hassellöv et al., 2013). Its impacts are present across many scales, from the microscopic,  
35 through to ecosystems and on to the global (Gattuso and Hansson, 2011). Its consequences are not limited by  
36 geography and are felt in and across national boundaries and in areas of the global commons. However,  
37 consequences are not experienced evenly, sometimes with those least responsible the most vulnerable. Further,  
38 ocean acidification has implications for biodiversity (Sutherland et al., 2009), economic stability (Narita et al.,  
39 2012) and sustainable development (Rockström et al., 2009) and its solutions are intimately tied with other  
40 complex global problems, such as climate change. Ocean acidification and its consequences are, therefore,  
41 pertinent to and present challenges for the work of a number of international institutions and yet, a response  
42 does not appear to fall neatly with the mandate of any. Thus, causing it to sit “within a very complex  
43 institutional landscape, at a rather cracked interface between the climate, biodiversity and oceans regimes”  
44 (Kim, 2012 p.257).

45 With no treaty or international instrument designed deliberately to address ocean acidification the issue is  
46 somewhat relegated to the ‘twilight zone’ with no single institution responsible for guiding a response. Despite  
47 this, there are a number of international institutions, including treaty bodies and specialised UN agencies that  
48 have expressed an interest in ocean acidification (UNGA, 2006; CCAMLR, 2009; UNFCCC, 2015b). However,  
49 much of this interest appears to be limited to calls of concern and knowledge production activities, with limited  
50 efforts to change legal frameworks or initiate implementation policies to integrate ocean acidification into  
51 existing structures (Billé et al., 2013).

52 Given this lack of substantive policy making, one is left asking what can be done to enhance the global  
53 governance of ocean acidification. One avenue that has been proposed is the creation of a comprehensive ocean  
54 acidification treaty, that would tackle all aspects of a response in one forum (Lamirande, 2011; Kim, 2012).  
55 However, such an effort seems unlikely at this time, with seemingly little support in the wider policy or  
56 academic communities. Thus, we are left attempting to fill the gaps by utilising existing international  
57 mechanisms to respond to ocean acidification.

58 This paper is, therefore, an effort to explore in more depth the existing international frameworks that are  
59 applicable to ocean acidification and can be utilised to take action. This paper proceeds by first exploring the  
60 problem of ocean acidification and its solutions. Six policy domains are proposed that need to be filled in order  
61 to prevent worsening acidification and address its impacts now and into the future. The discussion then turns to  
62 a review of activities initiated by the United Nations (UN) and UN affiliated bodies as well as international  
63 treaties deposited with the UN that have been implemented, at least in part, as a response to ocean acidification.  
64 This review reflects upon their capacity to fill all six policy domains. Substantial gaps are found, hence, non-  
65 acidification directed policies are accessed to see if it is possible that ocean acidification is being addressed  
66 without explicit intent to do so. Again the responses are found lacking. Thus, this paper turns to an exploration  
67 of existing mechanisms and institutions, which are not yet being applied to ocean acidification, to investigate  
68 how they can be utilised to further contribute to a response.

69



## 70 2. Responding to Ocean Acidification

71 An ocean acidification response has two main objectives: preventing acidification from worsening, while  
 72 simultaneously addressing the impacts that have already occurred (or those that are yet to occur due to already  
 73 released emissions). Billé et al. (2013) identified the main way to achieve these two goals. First and foremost is  
 74 the need to limit carbon dioxide concentrations in the atmosphere. This can be achieved by the direct reduction  
 75 of carbon dioxide emissions or the removal of carbon dioxide from the atmosphere. Reducing the local factors  
 76 that cause acidification, including nutrient inputs, can also help to prevent worsening acidification.  
 77 Strengthening ecosystem resilience to ocean acidification, adapting human activities in anticipation of, or  
 78 reaction to, ocean acidification, and repairing damages when the ocean has already acidified by restoring  
 79 degraded systems or reducing acidity using additives other than iron are all measures that can be used to address  
 80 the impacts of rising ocean acidity.

81 This range of available responses can be grouped under six types of policy domains (as summarised in Table 2).  
 82 *Mitigation* policies are those intended to lead to reductions in carbon dioxide emissions, while *non-CO<sub>2</sub>*  
 83 *mitigation* policies are those aimed at reducing non-CO<sub>2</sub> emissions that contribute to OA as well as efforts to  
 84 reduce or remove other local exacerbating factors, such as run-off. *Adaptation and Protection* measures are  
 85 policies aimed at enhancing resilience in human and ecological communities to enable them to better withstand  
 86 the impacts of ocean acidification. These are grouped together as the terms adaptation and protection appear to  
 87 be used interchangeably within a number of policy settings and can refer to either human or ecological  
 88 communities. *Restoration* policies are those intended to facilitate the repairing and rebuilding of ecological  
 89 communities harmed by ocean acidification, while *reparation* policies are those implemented to assist human  
 90 communities that have suffered damage or loss. Finally, those policies aimed at manipulating oceanic or  
 91 atmospheric properties to address ocean acidification, whether they be mitigation, restoration or other type  
 92 policies, are termed *geoengineering*, such as addition of additives to increase alkalinity.

93 **Table 1: Interventions for Preventing Worsening OA**

| POLICY DOMAIN                                                                                   | OBJECTIVE                                                                                                                                           | EXAMPLES                                                                                                                                                                                                                                                                                         |
|-------------------------------------------------------------------------------------------------|-----------------------------------------------------------------------------------------------------------------------------------------------------|--------------------------------------------------------------------------------------------------------------------------------------------------------------------------------------------------------------------------------------------------------------------------------------------------|
| CO <sub>2</sub> Mitigation                                                                      | Reducing the primary global driver of ocean acidification                                                                                           | Introduce renewables<br>Increase efficiency<br>Land use changes                                                                                                                                             |
| Non-CO <sub>2</sub> Mitigation                                                                  | Reducing the local factors that exacerbate ocean acidification                                                                                      | Reduce runoff<br>Reduce Non-CO <sub>2</sub> emissions                                                                                                                                                                                                                                            |
| Adaptation and Protection                                                                       | Building or maintaining resilience in order to assist human communities and ecological systems to overcome, absorb, return from or adjust to change | Establish marine protected areas<br>Reduce non-OA stressors<br>Alter species distribution <br>Protect ecosystem services<br>Identify alternative sources of income<br>Alter commercial/industrial practices |
|  Restoration | Repairing ecological communities after damage has occurred                                                                                          | Replant vegetation<br>Reseed coral reefs<br>Reintroduce species                                                                                                                                                                                                                                  |
|  Reparations | Ameliorating damage that has occurred within human communities                                                                                      | Establish reparation funds                                                                                                                                                                                                                                                                       |
| Geoengineering                                                                                  | Altering the physical properties of the ocean or atmosphere to prevent further acidification or reduce acidity                                      | Sequester CO <sub>2</sub><br>Remove CO <sub>2</sub> from atmosphere<br>Increase alkalinity of water                                                                                                                                                                                              |

94

95 This suite of options for tackling ocean acidification begins with the reduction of carbon dioxide in the  
 96 atmosphere. It is the primary solution to halting further increases in acidity as it is largely these emissions that



197 will determine the trajectory of the acidity of the global ocean in the near future (Caldeira and Wickett, 2003).  
198 This can be achieved, for example, via the introduction of renewable energy and the removal of fossil fuels,  
199 increases in efficiency of energy production, changes in land use and the capture and storage of carbon dioxide.  
200 In addition to carbon dioxide, local factors can exacerbate or alleviate this global trend and therefore for some  
201 locations the removal or reduction of these factors can be an important way of protecting discreet geographic  
202 areas, for example, limiting run-off (Cai et al., 2011) and reducing emissions, such as sulphur and nitrogen  
203 emissions from shipping (Doney et al., 2007).

204 While mitigation is the only way to prevent long term increases in acidity, negative effects are already occurring  
205 (De'ath et al., 2009; Bednaršek et al., 2014) and will continue to occur due to the locked in impacts from already  
206 released emissions (Joos et al., 2011). Thus, efforts to build and maintain resilience in order to assist human  
207 communities and ecological systems withstand, absorb, or adjust to these changes are also required. These types  
208 of policies can be targeted at protecting ecological communities, for example by establishing marine protected  
209 areas, clearance of invasive species and the removal of other anthropogenic stressors, such as pollution (Billé et  
210 al., 2013). Alternatively, policies can be targeted at ensuring human communities have the potential to adapt to  
211 changes, for example, by switching fisheries targets to less vulnerable species (Ekstrom et al., 2015) or  
212 establishing monitoring systems to allow commercial enterprises to respond appropriately to changing pH  
213 levels, as has occurred in Washington State oyster hatcheries (Barton et al., 2015).

214 It is also possible that efforts to reduce emissions, protect ecological systems and enhance the adaptive capacity  
215 of human communities may simply not be enough in some cases. As a result it is also important to consider  
216 whether human communities may be entitled to reparations for damages and loss experienced due to the impacts  
217 of ocean acidification. In addition, efforts will be needed to determine whether degraded ecosystems can and  
218 should be restored, and if so, via what methods. For example, the reintroduction of species, reseeded coral  
219 reefs, or increasing ocean pH via introduction of various additives (Rau et al., 2012).

### 220 3. Current Responses to Ocean Acidification

221 These six domains offer a typology for examining how the international community, via the UN and its  
222 affiliated institutions, is either preventing ocean acidification from worsening or responding to impacts that have  
223 already occurred. This research revealed that only three institutions, the London Convention and Protocol  
224 (LC&P), the OSPAR Convention, and the Convention on Biological Diversity (CBD), have implemented any of  
225 these types of policies with explicit consideration of ocean acidification.<sup>1</sup>

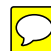

226 The Convention on the Prevention of Marine Pollution by Dumping of Wastes and Other Matter (LC, 1972),  
227 known as 'The London Convention' or the 'dumping Convention' was designed to prevent pollution of the  
228 ocean from the dumping of waste from vessels, aircrafts and platforms. The Convention functions by providing  
229 a banned list of substances that cannot be disposed of in the marine environment. The London Protocol (1996),  
230 designed to replace the Convention is more precautionary and provides a 'reverse list' naming substances that  
231 may be considered for dumping, while prohibiting all others (Annex 1). The Convention on Biological Diversity

<sup>1</sup> A number of other activities were found to have been initiated in response to ocean acidification, including calls of concern, calls for action and knowledge production, all of which are important and contribute to the larger discourse around ocean acidification and will (hopefully) lead to further policy making. However, these activities are beyond the scope of this particular discussion as they are not classified as policies designed to directly prevent further acidification or address the impacts that have already occurred.

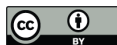

132 (1992a) was designed to conserve biological diversity, as well as its sustainable and equitable use. The  
133 Convention provides a framework for national action via agreed upon goals and guidelines, without putting in  
134 place many binding obligations, beyond the obligation to address the issues covered by the Convention  
135 (Secretariat, 2001). Both the LC&P and the CBD are conventions with global scope and both enjoy fairly high  
136 participation rates (with 87, 48 and 196 members respectively). The Convention for the Protection of the Marine  
137 Environment of the North-East Atlantic, or the “OSPAR Convention” (1992) is a regional convention focused  
138 on the protection of the North-East Atlantic and has 18 contracting parties. The objectives of the OSPAR  
139 Convention are implemented via the adoption of decisions (which are legally binding) and recommendations  
140 and other agreements that guide the activities of its members.

### 141 3.1 Geoengineering

142 As early as 2004, ocean acidification began to appear in discussions around the possible placement of carbon  
143 dioxide in the OSPAR maritime area as a way of addressing climate change. The potential detrimental effects of  
144 ocean acidification due to increasing anthropogenic carbon dioxide were highlighted and a review of existing  
145 knowledge was commissioned (OSPAR, 2005). This resulted in the publication of a technical report, *Effects on*  
146 *the marine environment of ocean acidification resulting from elevated levels of CO<sub>2</sub> in the atmosphere*, which  
147 provided an overview of ecosystem sensitivity to carbon dioxide exposure (Haugan et al., 2006).

148 In 2007, the OSPAR Commission (the decision-making body of the Convention) formally expressed concern  
149 over the ‘implications for the marine environment of climate change and ocean acidification due to elevated  
150 concentrations of carbon dioxide in the atmosphere’ (OSPAR, 2007b, p. 1). The Commission further recognised  
151 that the storage of carbon dioxide in geological formations could act as part of a portfolio of measures for  
152 mitigating these impacts (OSPAR, 2007a). OSPAR adopted a *Decision* to ensure environmentally safe storage  
153 of carbon dioxide streams in geological formations, while legally ruling prohibiting the placement of carbon  
154 dioxide streams in the water column or on the seabed, due to the likelihood of resulting harm to living resources  
155 and marine ecosystems (OSPAR, 2007b).

156 Echoing the discussions taking place within the OSPAR regime, the Consultative Meeting of Contracting  
157 Parties to the London Convention acknowledged, in 2005, that carbon dioxide posed a direct threat to the marine  
158 environment and was responsible for causing ocean acidification. It was also acknowledged that carbon dioxide  
159 sequestration and storage, which had effectively been banned until this point, could bring about benefits to the  
160 oceans in terms of reducing ocean acidification and climate change. Furthermore, it was agreed that the act of  
161 carbon sequestration and its implications for the marine environment came under the purview of the LC&P  
162 (IMO, 2005). As a result, in 2006 an amendment was made to Annex 1 of the Protocol (the ‘reverse list’) that  
163 allowed for the consideration of dumping of ‘carbon dioxide streams from carbon dioxide capture processes for  
164 sequestration’ (IMO, 2006, p.3). It was decided that carbon dioxide may only be considered for dumping if  
165 ‘disposal is into a sub-seabed geological formation’ (IMO, 2006, p.3), thereby effectively maintaining a  
166 prohibition on its disposal in the water column or on the sea floor.

### 167 3.2 Protection and Adaptation

168 In 2010, the OSPAR Commission *agreed* to ‘monitor and assess the nature, rate and extent of the effects of  
169 climate change and ocean acidification on the marine environment and consider appropriate ways of responding  
170 to those developments’ and that ‘[c]onsiderations of the impacts of climate change and ocean acidification, as



171 well as the need for adaptation and mitigation, will be integrated in all aspects of the work' (OSPAR, 2010, p.3).  
172 Significantly, the Commission also *agreed* that it would strengthen the OSPAR network of marine protected  
173 areas in recognition of their role in 'maintenance of ecosystem integrity and resilience against human activities  
174 and impacts of climate change and ocean acidification' (OSPAR, 2010, p.5).

175 Ocean acidification first began to appear in discussions within the CBD in 2008 when it was considered at the  
176 Subsidiary Body on Scientific, Technical and Technological Advice (SBSTTA)(SBSTTA, 2008). It then made  
177 its way on to the agenda of the 9<sup>th</sup> Convention of the Parties (COP), at which it was requested that the Executive  
178 Secretary, in conjunction with others, prepare a synthesis report of available scientific information pertaining to  
179 ocean acidification (CBD, 2008). The resulting report, *Scientific Synthesis of the Impacts of Ocean Acidification*  
180 *on Marine Biodiversity* (Secretariat, 2009), was considered at the following SBSTTA meeting. At which it was  
181 recommended that the COP adopt a decision expressing serious concern about increasing ocean acidification  
182 and the potential ~~threat~~ to biodiversity and ecosystems and the consequent impacts on the services they provide  
183 (SBSSTA, 2010). SBSTTA also recommended that the COP request the Executive Secretary to, in conjunction  
184 with other relevant organisations and scientific groups, develop a series of expert review processes to monitor  
185 and assess the impacts of ocean acidification and widely disseminate the result to raise awareness both within  
186 the CBD and without. SBSTTA also suggested that given the relationship between atmospheric carbon dioxide  
187 concentration and ocean acidification the COP request the Executive Secretary to transmit the findings to the  
188 Secretariat of the UNFCCC (SBSSTA, 2010). All of these recommendations were accepted at the 10<sup>th</sup> COP, at  
189 which the COP expressed 'its serious concern that increasing ocean acidification, as a direct consequence of  
190 increased carbon dioxide concentration in the atmosphere, reduces the availability of carbonate minerals in  
191 seawater...' (CBD, 2010b p.12)

192 The CBD COP also adopted a list of Ecologically or Biologically Significant Marine Areas (ESBAs) and  
193 encouraged their conservation and sustainable use. These areas were identified as serving an important purpose  
194 in supporting the healthy functioning of the ocean and included the *Western South Pacific high aragonite*  
195 *saturation state zone*. An area identified as having the highest aragonite saturation state in the ocean today and,  
196 therefore, the last to fall below critical thresholds with increasing acidification (CBD, 2012). This area,  
197 therefore, may be the slowest to be impacted by ocean acidification and potentially the fastest to recover.

198 Significantly, the COP also set out a revised and updated strategic plan for biodiversity for 2011-2020, which  
199 included establishing new biodiversity targets, the "Aichi Targets" (CBD, 2010c). The Aichi Targets set out a  
200 series of goals aimed at halting the loss of biodiversity by 2020. Target 10 recommends that 'the multiple  
201 anthropogenic pressures on coral reefs, and other vulnerable ecosystems impacted by climate change or ocean  
202 acidification are minimized, so as to maintain their integrity and functioning' (CBD, 2010c, p.119). The rationale  
203 provided for this target is that the reduction of stressors affecting ecosystems will help to make them less  
204 vulnerable to the impacts of acidification over the short to medium-term, thus, providing more time to address  
205 acidification over the longer-term. 'Ultimately the aim of this target is to provide ecosystems with the greatest  
206 probability of maintaining their integrity and functioning despite the effects of climate change and/or ocean  
207 acidification' (CBD, 2013, p.1). Pollution control, reducing over-exploitation and harvesting, eradication of  
208 invasive species are all activities offered as ways to reach this target. While remaining fairly vague, this is



209 significant as it is the first target set by any international institution with a timeframe for responding to ocean  
210 acidification.

211 In response to this target, SBSTTA suggested a series of practical responses available to Parties to meet Target  
212 10 and help reduce threats from ocean acidification. With regards to mitigation, Parties were encouraged to  
213 work towards emission reductions of carbon dioxide and to participate in the UNFCCC, IPCC and other related  
214 processes. These are relatively vague and aspirational and it appears that mitigation activities have largely been  
215 deferred to other bodies, such as the UNFCCC, that are deemed more relevant to the task. However, the  
216 guidance offered for maintaining and restoring ecosystem resilience is far more detailed and includes specific  
217 activities that governing bodies can implement, including effectively managing coastal runoff, limiting the  
218 impacts of unsustainable fishing practices and the reduction of local pollutants (SBSTTA, 2012).

### 219 3.3 Substantial Gaps in the Response to Ocean Acidification

220 The substantive activities of the CBD, OSPAR Convention and the LC&P, as summarised in Table 2, are useful  
221 first steps in crafting an international response to ocean acidification. However, these policies by themselves are  
222 unable to prevent worsening acidification. This is in large part because these activities focus on the protection of  
223 species and ecosystems and the regulation of geoengineering efforts and do not tackle the root cause of ocean  
224 acidification – rising carbon dioxide emissions. Activities focused on alleviating local pressures, protecting and  
225 restoring ecosystems and helping human communities to adapt and respond are critical to ensuring positive  
226 outcomes in the face of ocean acidification. However, the success of interventions designed to alleviate the  
227 pressure of ocean acidification greatly declines with increasing emissions (Gattuso et al., 2015). Thus, these  
228 options are only viable when coupled with substantive action to reduce carbon dioxide emissions. Without  
229 measures to reduce carbon dioxide, non-CO<sub>2</sub> interventions become more costly and less effective and are only  
230 capable of delaying the worsening impacts of ocean acidification for a short period of time (Kennedy et al.,  
231 2013). As a result, non-CO<sub>2</sub> mitigation, protection, adaptation, restoration and reparation efforts, while  
232 important, remain largely ancillary to CO<sub>2</sub> reduction efforts and should only be viewed as effective when  
233 coupled with CO<sub>2</sub> emission reductions.

234 **Table 2: Policies Initiated with Explicit Intent to Respond to Ocean Acidification**

| INTERVENTION                     | OSPAR Convention                                                    | LC&P                                                                                  | CBD                                                                                  |
|----------------------------------|---------------------------------------------------------------------|---------------------------------------------------------------------------------------|--------------------------------------------------------------------------------------|
| <b>CO<sub>2</sub> Mitigation</b> |                                                                     |                                                                                       |                                                                                      |
| Non-CO <sub>2</sub> Mitigation   |                                                                     |                                                                                       | Recommended minimization of anthropogenic pressures on ecosystems impacted by OA     |
| Adaptation and Protection        | Agreed to strengthen the OSPAR network of marine protected areas    |                                                                                       | Identified Western South Pacific high aragonite saturation state zone for protection |
| Restoration                      |                                                                     |                                                                                       |                                                                                      |
| Reparations                      |                                                                     |                                                                                       |                                                                                      |
| Geoengineering                   | Prohibited the disposal of carbon dioxide on or above the sea floor | Allowed for the sequestration of CO <sub>2</sub> in sub-seabed geological formations. |                                                                                      |

235





#### 236 4. Co-Benefits of Non-Ocean Acidification Directed Policies

237 It is evident that there are substantial gaps in the current governance of ocean acidification, especially in the  
238 domains of carbon dioxide mitigation, restoration and reparations. Even within those domains with existent  
239 policies there is room for additional efforts to create a more robust response to acidification. However, it is  
240 possible that efforts already exist that have been initiated without consideration of ocean acidification, that may  
241 actually be deemed relevant to its response.

##### 242 4.1 CO<sub>2</sub> Mitigation

243 Most significant is the work  undertaken within the United Nations Framework Convention on Climate  
244 Change (UNFCCC)(1992a) to regulate emissions of carbon dioxide. As the main international institution  
245 working to regulate carbon dioxide emissions, it is this institution that has the largest potential to determine  
246 future levels of ocean acidity. To date, there has been little activity on behalf of the COP to consider ocean  
247 acidification in discussions of targets and timelines for emission reductions. Nevertheless, rapid decarbonisation  
248 in order to address climate change would also address ocean acidification. In the most recent Paris Agreement,  
249 Parties agreed to hold 'the increase in the global average temperature to well below 2°C above pre-industrial  
250 levels and pursuing efforts to limit the temperature increase to 1.5°C above pre-industrial levels'(UNFCCC,  
251 2015a, p.3).

252 This agreement, paves the way for large-scale emission reductions, resulting in decarbonisation, thereby  
253 preventing future acidification. However, the agreement also leaves room for less ambitious action, including  
254 surpassing a 1.5°C rise in global temperatures, delaying a reduction to net zero emissions by as late of the end of  
255 the century and utilising technologies to remove substantial amounts of carbon dioxide from the atmosphere  
256 later in the century. Such scenarios would allow for continued high emissions in the short-term and rapid  
257 reductions at a later time, which would result in worsening acidification and irreversible impacts in the near  
258 future (Mathesius et al., 2015). The UNFCCC Expert Review suggested that there is a high likelihood of a  
259 meaningful difference in impacts resulting from global temperature increases of 1.5 or 2°C. At 1.5°C risk from  
260 acidification is likely to be on the verge of high risk, whereas at 2°C the risk would already be high. In addition,  
261 an overshoot of the target followed by a rapid reduction in emissions would likely result in impacts from  
262 acidification, irreversible for tens of thousands of years due to slow ocean processes (UNFCCC, 2015b). Thus, it  
263 is difficult to conclude that the Paris Agreement, unless implemented in its most stringent form, is strong  
264 enough to prevent a worsening of acidification into the future. As a result, there is still a need to work towards  
265 stronger targets and timelines with consideration of ocean acidification.

266 There has been additional work to reduce carbon dioxide emissions undertaken within the International  
267 Convention for the Prevention of Pollution from Ships (MARPOL)(1973). MARPOL has taken steps to regulate  
268 carbon dioxide emissions from the shipping industry, which account for approximately 2.2 percent of global  
269 emissions (MARPOL, 2017), via the introduction of operational and technical measures (MEPEC, 2011). While  
270 not implemented with reference to ocean acidification, nor comprising a big enough reduction in global  
271 emissions to prevent further acidification, this is significant as it is the first mandatory regime for regulating the  
272 emissions of a global industry. Such measures will aid in attempts to reduce global emissions and paves the way  
273 for other industry specific regulations to occur within other institutions.



#### 274 **4.2 Non-CO<sub>2</sub> Mitigation**

275 MARPOL has also been instrumental in setting limits on the emissions of sulphur and nitrogen and other  
276 pollutants from ships. Again, these regulations have been put in place to reduce air pollution and not as an  
277 attempt to respond to ocean acidification. Although a 2010 submission by the United States proposing areas to  
278 be designated as Sulphur Emission Control Areas noted that sulphur and nitrogen deposition from ships causes  
279 local acidification of marine waters (MPEC, 2010).

#### 280 **4.3 Geoengineering**

281 Along with efforts to reduce carbon dioxide and non-CO<sub>2</sub> emissions a number of efforts have been initiated to  
282 regulate marine geoengineering. This is significant as some of these activities are thought likely to exacerbate  
283 ocean acidification (Cao and Caldeira, 2010). Concerns have been raised within the CBD and LC&P over the  
284 effectiveness and possible negative impacts on the marine environment of iron fertilization (with no mention of  
285 ocean acidification). In 2008, the CBD COP requested Parties and urged other governments to 'ensure that  
286 ocean fertilization activities do not take place until there is an adequate scientific basis on which to justify such  
287 activities' (CBD, 2008). Noting this decision, the LC&P placed a moratorium on all ocean fertilization activities  
288 (excluding those conducted for legitimate scientific research purposes) (LC&P, 2008). Further, in 2010 the CBD  
289 COP adopted a decision that invited Parties and other Governments to ensure 'that no climate-related geo-  
290 engineering activities that may affect biodiversity take place, until there is an adequate scientific basis on which  
291 to justify such activities and appropriate consideration of the risks for the environment and biodiversity and  
292 associated social, economic and cultural impacts' (CBD, 2010a, p.5). While these steps are useful in regulating  
293 geoengineering, it is possible that such efforts will still go ahead, thus there is a need to consider their impacts,  
294 positive, negative, or benign, for ocean acidification prior to their deployment.

#### 295 **4.4 Protection, Adaptation and Restoration**

296 Also of relevance to ocean acidification are the multitude of conservation measures that have been implemented  
297 under various institutions. Listing all is simply beyond the scope of this paper; however, efforts include  
298 establishing marine protected areas, limiting fishery quotas, and restoration of local habitats. These policies may  
299 play a role in boosting resiliency and protecting biodiversity from increasing acidity, as well as restoring  
300 impacted systems and aiding human communities in adapting to changing conditions. However, conservation  
301 measures implemented without consideration of the trajectory and impacts of ocean acidification may allow  
302 activities that will exacerbate ocean acidification. In addition, they may simply not be constructed or  
303 implemented in a way that helps human and ecological communities to overcome the impacts of ocean  
304 acidification. For instance, it is not enough to have areas designated as protected, it is recommended that they be  
305 specifically located to avoid hotspots of acidification (Hofmann et al., 2011; Kelly et al., 2011), while  
306 simultaneously placed to act as refugia, either by preserving areas that are likely to acidify at a slower rate or by  
307 protecting populations that exhibit high levels of genetic diversity and natural resilience (Billé et al., 2013).  
308 Thus, if institutions wish to protect and restore ecological communities and aid the human communities  
309 dependent upon them, conservation measures need to be designed with ocean acidification in mind.

#### 310 **Gaps Still Exist**

311 It is evident that there are a number of existing policies, initiated without consideration of ocean acidification,  
312 which are able to help lessen worsening acidification and address impacts (See Table 3 for a summary). Efforts



313 to reduce carbon dioxide emissions within the UNFCCC have, to date, not considered ocean acidification and  
 314 thus, are not strong enough to prevent increasing acidification in the future. Other mitigation policies, including  
 315 those within MARPOL provide positive steps to reduce industry wide emissions of carbon dioxide, however are  
 316 not broad enough to capture a large enough segment of emissions so as to prevent future acidification. In  
 317 addition, general conservation measures are likely to have a positive effect on ecosystems in the face of rising  
 318 acidity. However, without specific intent to address acidification it is possible that such measures could miss  
 319 important opportunities with regards to protecting ecological systems. Further, few legally binding restrictions  
 320 have been placed on deployment of geoengineering efforts and thus, may be used in the future. It is important to  
 321 understand how such efforts could interact with ocean acidification and ensure that the possible negative  
 322 impacts are considered prior to their deployment.

323 **Table 1: Existing Policies that Form a Response Ocean Acidification**

| INTERVENTION                   | OSPAR Convention                                                    | LC&P                                                                                                                                                                 | CBD                                                                                  | UNFCCC                                      | MARPOL                                                      |
|--------------------------------|---------------------------------------------------------------------|----------------------------------------------------------------------------------------------------------------------------------------------------------------------|--------------------------------------------------------------------------------------|---------------------------------------------|-------------------------------------------------------------|
| CO <sub>2</sub> Mitigation     |                                                                     |                                                                                                                                                                      |                                                                                      | Agreed to rapid reductions of GHG emissions | Operational and technical measures to reduce ship emissions |
| Non-CO <sub>2</sub> Mitigation |                                                                     |                                                                                                                                                                      | Recommended minimization of anthropogenic pressures on ecosystems impacted by OA     |                                             | SOx and NOx regulations                                     |
| Adaptation and Protection      | Agreed to strengthen the OSPAR network of marine protected areas    |                                                                                                                                                                      | Identified Western South Pacific high aragonite saturation state zone for protection |                                             |                                                             |
| Restoration                    |                                                                     |                                                                                                                                                                      |                                                                                      |                                             |                                                             |
| Reparations                    |                                                                     |                                                                                                                                                                      |                                                                                      |                                             |                                                             |
| Geoengineering                 | Prohibited the disposal of carbon dioxide on or above the sea floor | -Allowed for the sequestration of CO <sub>2</sub> in sub-seabed geological formations.<br>-Moratorium on iron fertilization and other forms of marine geoengineering | Requested ocean fertilization activities do not occur                                |                                             |                                                             |

324

325 It appears that while there are a series of policies currently forming an international response to ocean  
 326 acidification, they are simply not enough, even when coupled with non-acidification directed efforts, to prevent  
 327 the worsening of ocean acidification or address its impacts. Thus, this paper will now turn to a discussion of  
 328 existing policies within international institutions that are not currently being utilised to respond to ocean  
 329 acidification that could be employed to enhance efforts to prevent worsening of ocean acidification and respond  
 330 to impacts as they occur.



## 331 5. Utilising Existing International Instruments

### 332 5.1 CO<sub>2</sub> Mitigation

333 With regards to the mitigation of carbon dioxide emissions, the UNFCCC remains the venue in which the  
334 international community has come together to regulate emissions. As discussed above the Paris Agreement has  
335 established a long-term goal for emission reductions that provides a pathway for avoiding unacceptable risks  
336 associated with both ocean acidification and climate change. However, the leniencies built into the agreement  
337 mean that this is not guaranteed. Thus, there is still a need for broader incorporation of ocean acidification  
338 into discussions within the UNFCCC (Harrould-Kolieb, 2016). This could be worked into the periodic reviews  
339 that will take place in regards to strengthening the long-term goal and the timeline for meeting this goal. Some  
340 scholars, however, suggest that this is unlikely to occur due to structural limitations of the UNFCCC mandate  
341 that effectively prevents a more meaningful consideration of ocean acidification within the workings of the  
342 Convention (Baird et al., 2009; Kim, 2012). However, these are narrow readings of the Convention and do not  
343 take into account its progressive nature with regards to the incorporation of developing science (Harrould-  
344 Kolieb, 2016). Thus, it is possible and critical for ocean acidification to be considered alongside climate change  
345 when setting targets, timelines and methods for emission reductions within the UNFCCC.

346 It is worth noting that a number of other fora, including the United Nations Convention on the Law of the Sea  
347 (UNCLOS)(1982) and the United Nations Fish Stocks Agreement (UNFSA)(1995) have been proposed as  
348 avenues for limiting carbon dioxide emissions, primarily due to their obligations to protect the marine  
349 environment through the regulation of pollutants. These institutions are seen as particularly attractive as they  
350 both have binding dispute resolution mechanisms in place that could, it is proposed, essentially be used to  
351 compel states to reduce their carbon dioxide emissions (Boyle, 2012; Burns, 2006). However, these institutions  
352 are unlikely to be utilised, primarily because of the significant duplication of efforts already being pursued  
353 within the UNFCCC to reduce emissions (Boyle, 2012). These institutions are also less widely subscribed to  
354 than the UNFCCC, and it is questionable whether the dispute resolution mechanisms could be used to compel  
355 some of the largest emitters, including the United States, that have not yet ratified the treaty. Thus, the UNFCCC  
356 remains the most likely venue for achieving a global reduction in carbon dioxide emissions.

### 357 5.2 Non-CO<sub>2</sub> Mitigation

358 The broad pollution controls offered under UNCLOS, which impose management obligations on Parties to limit  
359 marine pollution (UNCLOS, 1982a), could be used to encourage states to make greater effort to reduce non-CO<sub>2</sub>  
360 drivers of ocean acidification. Similarly, UNFSA requires Parties to 'minimize pollution' (UNFSA, 1995) and  
361 while no definition of pollution is provided within the agreement text, it could be reasonably interpreted to  
362 include pollutants that increase coastal acidification, especially as linkages between increasing acidity and  
363 impacts to fisheries become more apparent (Branch et al., 2013). In addition, the Global Programme of Action  
364 for the Protection of the Marine Environment from Land-based Activities (GPA), established by the Washington  
365 Declaration on Protection of the Marine Environment from Land-Based Activities (UNEP, 1995), provides a  
366 forum for limiting nutrient run-off, indeed, the GPA was tasked with working on 'on nutrients, litter and  
367 wastewater' and identified a number of land-based sources of pollution including sewage, nutrients, sediment  
368 mobilisation, persistent organic pollutants, oils, litter, heavy metals and radioactive substances on which to  
369 focus its work (UNEP, 2015). Similarly, the CBD has agreed in Aichi Target number 8, that nutrient pollution



370 be brought to sustainable levels by 2020 so as not to negatively impact ecosystem function and biodiversity  
371 (CBD, 2010c).

372 These are all existing measures that can easily be understood to include efforts to reduce the local causes of  
373 ocean acidification. Further, institutions that manage networks of marine protected areas, including, for  
374 example, OSPAR, UNFSA and the Convention on the Conservation of Antarctic Marine Living Resources  
375 (CCAMLR)(1980a), could incorporate the local reduction of acidity into the MPA management as a regular  
376 operating procedure (Billé et al., 2013). It has been suggested that an implementing agreement under UNCLOS  
377 could provide an avenue for establishing a series of marine protected areas beyond national jurisdictions (CBD,  
378 2006), such areas would be governed by the objectives of UNCLOS, including limiting pollution to the marine  
379 environment. Thus, these MPAs could be established with consideration of ocean acidification and managed  
380 with the intent of responding to it.

### 381 **5.3 Adaptation and Protection**

382 Marine protected areas could also be utilised to enhance resilience and adaptive capacity of ecological and  
383 human communities affected by ocean acidification. The identification and protection of areas that may act as  
384 refugia or hotspots of biodiversity would act to reduce stressors and encourage greater resilience in the face of  
385 ocean acidification. Consideration of ocean acidification could be incorporated into existing strategies and  
386 guidelines for designing and managing MPA networks, such as those designated by the IUCN World  
387 Commission on Protected Areas, which contain guidelines for best practice in regards to climate change (IUCN-  
388 WCPA, 2008) . Similarly, ocean acidification could be incorporated into the General framework for the  
389 establishment of CCAMLR Marine Protected Areas, which already recognises the role of MPAs in contributing  
390 to sustaining ecosystem structure and function and aims to protect areas in order to maintain resilience or the  
391 ability to adapt to the effects of climate change (CCAMLR, 2011). CCAMLR has the ability to designate marine  
392 protected areas that can exclude fishing activities, ship discharges and dumping of wastes, as well as setting  
393 catch limits and designating open and closed seasons for fisheries (CCAMLR, 1980b). All of which could be  
394 useful in protecting species, such as krill, that are likely to be impacted severely by increasing acidity  
395 (Kawaguchi et al., 2011;Kawaguchi et al., 2013) and the Southern Ocean areas that are rapidly acidifying  
396 (McNeil and Matear, 2008). These treaties could be utilised to create networks of protected areas with the  
397 expressed intent of combatting ocean acidification.

398 The UNFSA and various regional fisheries management organisations (RMFOs) also offer venues for the  
399 consideration of the impact of ocean acidification on fisheries and the management options required to ensure  
400 functional fisheries into the future. These could include the adjusting of take limits and establishing no take  
401 zones to boost resilience in areas most vulnerable to ocean acidification. The CBD could also provide a venue to  
402 host a broader discussion about the integration of ocean acidification into biodiversity adaption and protection  
403 planning. Specifically via the *Climate Change Adaptation Database* that offers guidance on adaptation options  
404 to Parties(CBD, 2017)

### 405 **5.4 Restoration**

406 The CBD also offers an important venue for initiating activities to restore ecosystems degraded by ocean  
407 acidification. Indeed, Article 8(f) of the Convention states that ‘each Contracting Party shall [...] [r]ehabilitate  
408 and restore degraded ecosystems and promote the recovery of threatened species, inter alia, through the



409 development and implementation of plans or other management strategies' (CBD, 1992a). Further, Target 14 of  
410 the Aichi Targets requires that 'ecosystems that provide essential services, including services related to water,  
411 and contribute to health, livelihoods and well-being, are restored and safeguarded' (CBD, 2010c). Thus,  
412 restoration of species and ecosystems degraded by ocean acidification fall easily within the CBD mandate. The  
413 RAMSAR Convention on Wetlands (1971) could also offer a venue for restoration activities pertaining to coral  
414 reefs and coastal areas affected by ocean acidification as it contains a very broad definition of wetland that  
415 includes coral reefs and marine waters to a depth of six meters at low tide (RAMSAR, 1971).

#### 416 **5.5 Reparations**

417 The UNFCCC COP has initiated efforts to consider ways to address the loss and damages experienced in  
418 developing countries due to climate change (UNFCCC, 2017). Interestingly, ocean acidification appears as part of  
419 this discussion; listed as a slow onset event that could result in loss and damage (UNFCCC, 2010). This is the  
420 only mention of ocean acidification in any outcome documents of the COP to date. Here the COP recognised the  
421 need for greater effort to better understand and reduce the loss and damage associated with, among other things,  
422 the impacts of slow onset events, including ocean acidification. In 2013, following two years of deliberations,  
423 the Warsaw International Mechanism for Loss and Damage was established (UNFCCC, 2014). It is, as yet,  
424 unclear how the mechanism will progress (Surminski and Lopez, 2014) and how and to what extent ocean  
425 acidification will be factored in. However, this could provide an avenue for addressing issues of reparations  
426 associated with loss and damage resulting from ocean acidification.

#### 427 **5.6 Geoengineering**

428 Geoengineering, like ocean acidification, presents numerous governance challenges as it is a cross-sectional  
429 issue that falls under the interest areas of many international institutions while, simultaneously not fitting neatly  
430 within the mandate any one. As yet, there is no clear governance framework applicable to geoengineering.  
431 However, it has been suggested that the use of international environmental impact assessment (EIA)  
432 mechanisms could be an avenue for increasing geoengineering governance (Craik, 2015). This could also offer a  
433 pathway for assessing whether individual geoengineering schemes are likely to be positive, negative or neutral  
434 with regards to ocean acidification.

435 There are a series of institutions that offer EIA mechanisms that could be utilised for this purpose, including  
436 UNCLOS that imposes an obligation on states to assess the potential effects of planned activities that 'may  
437 cause substantial pollution of or significant and harmful changes to the marine environment' (UNCLOS,  
438 1982b). The CBD also requires states to 'introduce appropriate procedures requiring environmental impacts  
439 assessment of its proposed projects that are likely to have significant adverse effects on biological diversity'  
440 (CBD, 1992b). There is also a clause in the UNFCCC that makes reference to undertaking impact assessments  
441 in order to minimize adverse effects resulting from projects or measures undertaken to mitigate or adapt to  
442 climate change (UNFCCC, 1992b). For regional impacts, the Protocol on Environmental Protection to the  
443 Antarctic Treaty (1991b) offers EIA requirements for all activities occurring within the Antarctic Treaty area  
444 that could have even a 'minor or transitory impact' (ATS, 1991). The Convention on Environmental Impact  
445 Assessment in a Transboundary Context (Espoo Convention) (1991a) may also be applicable as it offers  
446 processes to deal with transboundary impacts, which may occur due to the deployment of geoengineering  
447 mechanisms.



#### 448 5.7 Filling the Gaps

449 This section has proposed a series of existing instruments that could be utilised in order to enhance the current,  
 450 but wanting, international response to ocean acidification. These suggestions include utilising instruments  
 451 within institutions that are already responding to ocean acidification, such as the CBD. Opportunities exist  
 452 within this institution to expand efforts to mitigate the non-CO<sub>2</sub> causes of ocean acidification as well as  
 453 adaptation and protection, restoration and geoengineering efforts. Other institutions, such as UNCLOS, that  
 454 have previously been inactive with regards to ocean acidification, also offer avenues for increasing the  
 455 governance of ocean acidification. UNCLOS offers opportunities for action within efforts to reduce both carbon  
 456 dioxide emissions and the non-CO<sub>2</sub> causes of rising acidity. UNCLOS can also enhance efforts to adapt and  
 457 protect human and ecological systems from acidification, as well as the regulation of geoengineering via  
 458 environmental impact assessments.

459 These previously untapped opportunities offer the potential for addressing each of the six policy domains that  
 460 constitute a comprehensive response to ocean acidification. This is visualised in Table 4. The CBD and  
 461 UNCLOS are venues that could take on multifaceted responses to ocean acidification. Indeed, these two  
 462 institutions could act to guide the wider response across the international community. The UNFCCC is central  
 463 to this response with regards to reducing carbon dioxide emissions and is, currently, the only venue discussing  
 464 the issue of reparations with relations to loss and damage suffered due to climate change. It is also likely that the  
 465 UNFCCC will be abreast of any deployment of geoengineering schemes, and thus, incorporating ocean  
 466 acidification into the UNFCCC impact assessment will be an effective way of ensuring impacts with regards to  
 467 ocean acidity are considered. While the other institutions listed offer more ancillary avenues to responding to  
 468 ocean acidification, they do represent additional opportunities for creating a comprehensive response.

469 **Table 2: International Institutions Capable of Contributing to a Response to Ocean Acidification**

| INTERVENTION                   | CBD | UNCLOS | UNFCCC | OSPAR | UNFSA | MARPOL | CCAMLR | LC&P | GPA | RAMSAR | ATS | Espoo |
|--------------------------------|-----|--------|--------|-------|-------|--------|--------|------|-----|--------|-----|-------|
| CO <sub>2</sub> Mitigation     |     | X      | X      |       | X     | X      |        |      |     |        |     |       |
| Non-CO <sub>2</sub> Mitigation | X   | X      |        | X     | X     | X      | X      |      | X   |        |     |       |
| Adaptation and Protection      | X   | X      |        | X     | X     |        | X      |      |     |        |     |       |
| Restoration                    | X   |        |        |       |       |        |        |      |     | X      |     |       |
| Reparations                    |     |        | X      |       |       |        |        |      |     |        |     |       |
| Geoengineering                 | X   | X      | X      | X     |       |        |        | X    |     |        | X   | X     |

470

471

#### 472 6. Conclusion

473 This review of activities related to ocean acidification within the UN General Assembly and across the UN  
 474 family found that substantive action (rule-making or implementation) to prevent worsening ocean acidification  
 475 and to respond to impacts has largely not occurred. Indeed, only three institutions, the London Convention and  
 476 Protocol, the OSPAR Convention and the Convention on Biological Diversity, were found to have initiated any  
 477 rule making and implementation activities in direct response to ocean acidification. These are useful first steps  
 478 in crafting an international response to ocean acidification. However, these policies by themselves are unable to



479 prevent worsening acidification. This is in large part because these activities focus on the protection of species  
480 and ecosystems and the regulation of geoengineering efforts and do not tackle the root cause of ocean  
481 acidification – rising carbon dioxide emissions.

482 In addition to these activities there are a number of existing policies, initiated without consideration of ocean  
483 acidification, which are able to help lessen worsening acidification and address its impacts. However, these  
484 activities, in most cases, including carbon dioxide reduction efforts within the UNFCCC, have been found not to  
485 be strong enough to guarantee prevention of ocean acidification in the future. Other mitigation policies,  
486 including those within MARPOL provide positive steps to reduce industry wide emissions of carbon dioxide,  
487 however are not broad enough to capture a large enough segment of emissions so as to prevent future  
488 acidification. In addition, general conservation measures are likely to have a positive effect on ecosystems in the  
489 face of rising acidity. However, without specific intent to address acidification it is possible that such measures  
490 could miss important opportunities with regards to protecting ecological systems. Further, few legally binding  
491 restrictions have been placed on deployment of geoengineering efforts and thus, may be used in the future. It is  
492 important to understand how such efforts could interact with ocean acidification and ensure that the possible  
493 negative impacts are considered prior to their deployment. Thus, this range of activities were found wanting  
494 with regards to offering a strong, comprehensive response to rising ocean acidity and its impacts.

495 Therefore, a series of options for enhancing the current international response to ocean acidification utilising, as  
496 yet, untapped instruments was explored. This found, most importantly, that the CBD and UNCLOS could both  
497 take on a substantial amount of work to craft a response to ocean acidification. These two institutions are readily  
498 applicable to responding to ocean acidification due to their interests in conserving biodiversity and protecting  
499 the marine environment. These two institutions could also serve as focal points for and guide a wider  
500 international response to acidification. A number of other institutions were found to have instruments that could  
501 be utilised in responding to rising acidity and its impacts. Including, the UNFCCC that will need to remain the  
502 venue for the mitigation of carbon dioxide with regards to ocean acidification as it is the site of international  
503 efforts to regulate carbon dioxide as a response to climate change.

504 While this piecemeal approach responding to ocean acidification is perhaps far from ideal it is important to  
505 acknowledge that existing institutions are limited to some extent by their mandates in their capacity to initiate a  
506 holistic response to ocean acidification. For instance, being a regional agreement the OSPAR Convention is  
507 prevented from protecting marine ecosystems globally. The LC&P are limited to governing substances dumped  
508 into the ocean and do not have the capacity to regulate land-based emissions of carbon dioxide. Similarly, the  
509 CBD, while very broad in scope, is probably limited in its ability to regulate carbon dioxide. Despite the lack of  
510 a single institution able to tackle to problem of ocean acidification, this work has found there are a number of  
511 institutions capable of taking on different aspects of a response. Together these efforts, if employed, could cover  
512 all six policy domains that comprise a comprehensive response to acidification. It is unlikely that an existing  
513 institution can or will take on a comprehensive response to ocean acidification. Thus, this piecemeal approach,  
514 while far from ideal, offers a pathway forward that is politically feasible and achievable in the short- to medium-  
515 term – a critical timeframe with regards to this issue.

516

517





519 **References**

- 520 Convention on Wetlands of International Importance especially as Waterfowl Habitat, entered into force 1975,  
521 1971.
- 522 United Nations Convention on the Law of the Sea (UNCLOS), entered into force 1994, 1982.
- 523 Convention on Environmental Impact Assessment in a Transboundary Context (Espoo Convention), entered  
524 into force 1997, 1991a.
- 525 Protocol on Environmental Protection to the Antarctic Treaty, entered into force 1998, 1991b.
- 526 Convention for the Protection of the Marine Environment of the North-East Atlantic, entered into force 1998,  
527 1992.
- 528 Agreement for the Implementation of the Provisions of the United Nations Convention on the Law of the Sea of  
529 10 December 1982 relating to the Conservation and Management of Straddling Fish Stocks and Highly  
530 Migratory Fish Stocks, entered into force 2001, 1995.
- 531 Protocol to the Convention on the Prevention of Marine Pollution by Dumping of Wastes and Other Matter,  
532 1972, entered into force 2006, 1996.
- 533 ATS: Article 8: Environmental Impact Assessment, Protocol on Environmental Protection to the Antarctic  
534 Treaty, 1991.
- 535 Baird, R., Simons, M., and Stephens, T.: Ocean Acidification: A litmus test for international law, *Carbon and*  
536 *Climate Law Review*, 4, 459-471, 2009.
- 537 Barton, A., Waldbusser, G. G., Feely, R. A., Weisberg, S. B., Newton, J. A., Hales, B., Cudd, S., Eudeline, B.,  
538 Langdon, C. J., and Jefferds, I.: Impacts of coastal acidification on the Pacific Northwest shellfish industry and  
539 adaptation strategies implemented in response, *Oceanography*, 28, 146-159, 2015.
- 540 Bednaršek, N., Feely, R., Reum, J., Peterson, B., Menkel, J., Alin, S., and Hales, B.: *Limacina helicina* shell  
541 dissolution as an indicator of declining habitat suitability owing to ocean acidification in the California Current  
542 Ecosystem, *Proc. R. Soc. B*, 2014, 20140123,
- 543 Billé, R., Kelly, R., Biastoch, A., Harrould-Kolieb, E., Herr, D., Joos, F., Kroeker, K., Laffoley, D., Oschlies,  
544 A., and Gattuso, J.-P.: Taking action against ocean acidification: a review of management and policy options,  
545 *Environmental management*, 52, 761-779, 2013.
- 546 Boyle, A.: Law of the Sea perspectives on climate change, *The International Journal of Marine and Coastal*  
547 *Law*, 27, 831-838, 2012.
- 548 Branch, T. A., DeJoseph, B. M., Ray, L. J., and Wagner, C. A.: Impacts of ocean acidification on marine  
549 seafood, *Trends in ecology & evolution*, 28, 178-186, 2013.
- 550 Burns, W. C.: Potential Causes of Action for Climate Change Impacts Under the United Nations Fish Stocks  
551 Agreement, *Sustainable Dev. L. & Pol'y*, 7, 34, 2006.
- 552 Cai, W.-J., Hu, X., Huang, W.-J., Murrell, M. C., Lehrter, J. C., Lohrenz, S. E., Chou, W.-C., Zhai, W.,  
553 Hollibaugh, J. T., and Wang, Y.: Acidification of subsurface coastal waters enhanced by eutrophication, *Nature*  
554 *Geoscience*, 4, 766-770, 2011.
- 555 Caldeira, K., and Wickett, M. E.: Oceanography: Anthropogenic carbon and ocean pH, *Nature*, 425, 365-365,  
556 2003.
- 557 Cao, L., and Caldeira, K.: Can ocean iron fertilization mitigate ocean acidification?, *Climatic Change*, 99, 303-  
558 311, 2010.

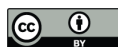

- 559 CBD: Convention on Biological Diversity, entered into force 1993, 1992a.
- 560 CBD: Article 14. Impact Assessment and Minimizing Adverse Impacts, Convention on Biological Diversity,  
561 1992b.
- 562 CBD: Decision VIII/24. Protected areas Convention on Biological Diversity, UNEP/CBD/COP/DEC/VIII/24,  
563 2006.
- 564 CBD: Decision IX/16. Biodiversity and climate change, Convention on Biological Diversity,  
565 UNEP/CBD/COP/DEC/IX/16, 2008.
- 566 CBD: Decision X/33. Biodiversity and climate change Convention on Biological Diversity,  
567 UNEP/CBD/COP/DEC/X/33, 2010a.
- 568 CBD: Decision X/29. Marine and coastal biodiversity, Convention on Biological Diversity,  
569 UNEP/CBD/COP/DEC/X/29, 2010b.
- 570 CBD: Decision X/2. The Strategic Plan for Biodiversity 2011-2020 and the Aichi Biodiversity Targets,  
571 Convention on Biological Diversity, UNEP/CBD/COP/DEC/X/2, 2010c.
- 572 CBD: Decision XI/17. Marine and coastal biodiversity: ecologically or biologically significant marine areas  
573 Convention on Biological Diversity, UNEP/CBD/COP/DEC/XI/17, 2012.
- 574 CBD: Quick guide to the Aichi Biodiversity Targets: Target 10 Pressures on vulnerable ecosystems reduced,  
575 Convention on Biological Diversity, 2013.
- 576 Climate Change Adaptation Database: Integrating Biodiversity into Climate Change Adaptation Planning.  
577 <https://adaptation.cbd.int>, access: 2017, 2017.
- 578 CCAMLR: Convention on the Conservation of Antarctic Marine Living Resources (CCAMLR), entered into  
579 force 1982, 1980a.
- 580 CCAMLR: Convention on the Conservation of Antarctic Marine Living Resources (CCAMLR), Article IX,  
581 1980b.
- 582 CCAMLR: Resolution 30/XXVIII (2009): Climate Change, 2009.
- 583 CCAMLR: Conservation Measure 91-04 (2011): General framework for the establishment of CCAMLR Marine  
584 Protected Areas, Convention on the Conservation of Antarctic Marine Living Resources (CCAMLR), 2011.
- 585 Craik, N.: International EIA Law and Geoengineering: Do Emerging Technologies Require Special Rules?,  
586 *Climate Law*, 5, 111-141, 2015.
- 587 De'ath, G., Lough, J. M., and Fabricius, K. E.: Declining coral calcification on the Great Barrier Reef, *Science*,  
588 323, 116-119, 2009.
- 589 Doney, S. C., Mahowald, N., Lima, I., Feely, R. A., Mackenzie, F. T., Lamarque, J.-F., and Rasch, P. J.: Impact  
590 of anthropogenic atmospheric nitrogen and sulfur deposition on ocean acidification and the inorganic carbon  
591 system, *Proceedings of the National Academy of Sciences*, 104, 14580-14585, 2007.
- 592 Doney, S. C., Fabry, V. J., Feely, R. A., and Kleypas, J. A.: Ocean acidification: the other CO<sub>2</sub> problem, *Marine  
593 Science*, 1, 2009.
- 594 Ekstrom, J. A., Suatoni, L., Cooley, S. R., Pendleton, L. H., Waldbusser, G. G., Cinner, J. E., Ritter, J.,  
595 Langdon, C., Van Hooidonk, R., and Gledhill, D.: Vulnerability and adaptation of US shellfisheries to ocean  
596 acidification, *Nature Climate Change*, 5, 207, 2015.
- 597 Gattuso, J. P., Magnan, A., Bille, R., Cheung, W. W. L., Howes, E. L., Joos, F., Allemand, D., Bopp, L.,  
598 Cooley, S. R., Eakin, C. M., Hoegh-Guldberg, O., Kelly, R. P., Portner, H.-O., Rogers, A. D., Baxter, J. M.,



- 599 Laffoley, D., Osborn, D., Rankovic, A., Rochette, J., Sumaila, U. R., Treyer, S., and Turley, C.: Contrasting  
600 futures for ocean and society from different anthropogenic CO<sub>2</sub> emissions scenarios, *Science*, 349, aac4722-  
601 4721-4710, 2015.
- 602 Harrould-Kolieb, E. R.: Ocean Acidification and the UNFCCC: Finding Legal Clarity in the Twilight Zone,  
603 *Wash. J. Envtl. L. & Pol'y*, 6, 613, 2016.
- 604 Hassellöv, I. M., Turner, D. R., Lauer, A., and Corbett, J. J.: Shipping contributes to ocean acidification,  
605 *Geophysical Research Letters*, 40, 2731-2736, 2013.
- 606 Haugan, P., Turley, C., and Pörtner, H.-O.: Effects on the marine environment of ocean acidification resulting  
607 from elevated levels of CO<sub>2</sub> in the atmosphere, OSPAR intersessional correspondence group, 2006.
- 608 Hofmann, G. E., Smith, J. E., Johnson, K. S., Send, U., Levin, L. A., Micheli, F., Paytan, A., Price, N. N.,  
609 Peterson, B., and Takeshita, Y.: High-frequency dynamics of ocean pH: a multi-ecosystem comparison, *PLoS*  
610 *one*, 6, e28983, 2011.
- 611 IMO: Report of the 27TH Consultative Meeting of the Contracting Parties to the Convention on the Prevention  
612 of Marine Pollution by Dumping of Wastes and Other Matter 1972, International Maritime Organization LC  
613 27/16, 2005.
- 614 IMO: Notification of amendments to Annex 1 to the London Protocol 1996 International Maritime  
615 Organization, LC-LP.1/Circ.5, 2006.
- 616 IUCN-WCPA: Establishing Marine Protected Area Networks—Making It Happen, IUCN World Commission  
617 on Protected Areas, National Oceanic and Atmospheric Administration and The Nature Conservancy,  
618 Washington, D.C., 118 pp., 2008.
- 619 Joos, F., Frölicher, T. L., Steinacher, M., and Plattner, G.-K.: Impact of climate change mitigation on ocean  
620 acidification projections, *Ocean acidification*, 272-290, 2011.
- 621 Kawaguchi, S., Kurihara, H., King, R., Hale, L., Berli, T., Robinson, J. P., Ishida, A., Wakita, M., Virtue, P.,  
622 and Nicol, S.: Will krill fare well under Southern Ocean acidification?, *Biology Letters*, 7, 288-291, 2011.
- 623 Kawaguchi, S., Ishida, A., King, R., Raymond, B., Waller, N., Constable, A., Nicol, S., Wakita, M., and  
624 Ishimatsu, A.: Risk maps for Antarctic krill under projected Southern Ocean acidification, *Nature Climate*  
625 *Change*, 3, 843, 2013.
- 626 Kelly, R. P., Foley, M. M., Fisher, W. S., Feely, R. A., Halpern, B. S., Waldbusser, G. G., and Caldwell, M. R.:  
627 Mitigating local causes of ocean acidification with existing laws, *Science*, 332, 1036-1037, 2011.
- 628 Kennedy, E. V., Perry, C. T., Halloran, P. R., Iglesias-Prieto, R., Schönberg, C. H., Wisshak, M., Form, A. U.,  
629 Carricart-Ganivet, J. P., Fine, M., and Eakin, C. M.: Avoiding coral reef functional collapse requires local and  
630 global action, *Current Biology*, 23, 912-918, 2013.
- 631 Kim, R. E.: Is a New Multilateral Environmental Agreement on Ocean Acidification Necessary?, *Review of*  
632 *European Community & International Environmental Law*, 21, 243-258, 2012.
- 633 Lamirande, H. R.: From sea to carbon cesspool: Preventing the world's marine ecosystems from falling victim to  
634 ocean acidification, *Suffolk Transnat'l L. Rev.*, 34, 183-273, 2011.
- 635 LC: Convention on the Prevention of Marine Pollution by Dumping of Wastes and Other Matter (London  
636 Convention), entered into force 1975, 1972.
- 637 LC&P: Resolution LC-LP.1(2008): On the Regulation of Ocean Fertilization London Convention and London  
638 Protocol, 2008.



- 639 MARPOL: International Convention for the Prevention of Pollution from Ships (MARPOL), entered into force  
640 1983, 1973.
- 641 <http://www.imo.org/en/OurWork/Environment/PollutionPrevention/AirPollution/Pages/Default.aspx>, 2017.
- 642 Mathesius, S., Hofmann, M., Caldeira, K., and Schellnhuber, H. J.: Long-term response of oceans to CO<sub>2</sub>  
643 removal from the atmosphere, *Nature Climate Change*, 5, 1107-1113, 2015.
- 644 McNeil, B. I., and Matear, R. J.: Southern ocean acidification: a tipping point at 450-ppm atmospheric CO<sub>2</sub>,  
645 *Proceedings of the National Academy of Sciences of the United States of America*, 105, 18860-18864, 2008.
- 646 MEPEC: Resolution MEPC.203(62): Inclusion of regulations on energy efficiency for ships in MARPOL  
647 Annex VI International Convention for the Prevention of Pollution from Ships (MARPOL), MEPC  
648 62/24/Add.1, 2011.
- 649 MPEC: Interpretations of, and Amendments to, MARPOL and Related Instruments: Designation of an Emission  
650 Control Area for Nitrogen Oxides, Sulphur Oxides and Particulate Matter, Submitted by the United States,  
651 International Convention for the Prevention of Pollution from Ships (MARPOL), MEPC 61/INF.9, 2010.
- 652 Narita, D., Rehdanz, K., and Tol, R. S.: Economic costs of ocean acidification: a look into the impacts on global  
653 shellfish production, *Climatic Change*, 113, 1049-1063, 2012.
- 654 OSPAR: Meeting of the Biodiversity Committee (BDC), OSPAR Convention for the Protection of the Marine  
655 Environment of the North-East Atlantic, BDC 05/13/1-E, 2005.
- 656 OSPAR: OSPAR Guidelines for Risk Assessment and Management of Storage of CO<sub>2</sub> Streams in Geological  
657 Formations, OSPAR Commission, Reference Number: 2007-12, 2007a.
- 658 OSPAR: Decision 2007/1 to Prohibit the Storage of Carbon Dioxide Streams in the Water Column or on the  
659 Sea-bed, Meeting of the OSPAR Commission ANNEX 5 (Ref. §2.9b), 2007b.
- 660 OSPAR: The North-East Atlantic Environment Strategy: Strategy of the OSPAR Commission for the Protection  
661 of the Marine Environment of the North-East Atlantic 2010–2020, OSPAR Commission, OSPAR Agreement  
662 2010-3, 2010.
- 663 RAMSAR: Convention on Wetlands of International Importance especially as Waterfowl Habitat, Article 1,  
664 1971.
- 665 Rau, G. H., McLeod, E. L., and Hoegh-Guldberg, O.: The need for new ocean conservation strategies in a high-  
666 carbon dioxide world, *Nature Climate Change*, 2, 720-724, 2012.
- 667 Rockström, J., Steffen, W., Noone, K., Persson, Å., Chapin III, F. S., Lambin, E., Lenton, T. M., Scheffer, M.,  
668 Folke, C., and Schellnhuber, H.: Planetary boundaries: exploring the safe operating space for humanity, *Ecology  
669 and Society*, 14, 32, 2009.
- 670 SBSSTA: Report of the Fourteenth Meeting of the Subsidiary Body on Scientific, Technical and Technological  
671 Advice, Convention on Biological Diversity, UNEP/CBD/COP/10/3, 2010.
- 672 SBSSTA: Report of the Expert Meeting to Develop a Series of Joint Expert Review Processes to Monitor and  
673 Assess the Impacts of Ocean Acidification on Marine and Coastal Biodiversity, Convention on Biological  
674 Diversity, UNEP/CBD/SBSTTA/16/INF/14, 2012.
- 675 SBSTTA: Report of the Subsidiary Body on Scientific, Technical and Technological Advice on the Work of its  
676 Thirteenth Meeting, Convention on Biological Diversity, UNEP/CBD/COP/9/3, 2008.
- 677 Secretariat: Global Biodiversity Outlook 1, Secretariat of the Convention on Biological Diversity, Montreal,  
678 2001.



679 Secretariat: Scientific Synthesis of the Impacts of Ocean Acidification on Marine Biodiversity, Technical Series  
680 No. 46, Secretariat of the Convention on Biological Diversity, Montreal, 2009.

681 Surminski, S., and Lopez, A.: Concept of loss and damage of climate change—a new challenge for climate  
682 decision-making? A climate science perspective, *Climate and Development*, 1-11, 2014.

683 Sutherland, W., Adams, W., Aronson, R., Aveling, R., Blackburn, T. M., Broad, S., Ceballos, G., Cote, I.,  
684 Cowling, R., and Da Fonseca, G.: One hundred questions of importance to the conservation of global biological  
685 diversity, *Conservation Biology*, 23, 557-567, 2009.

686 UNFCCC: Decision 2/CP.19: Warsaw international mechanism for loss and damage associated with climate  
687 change impacts United Nations Framework Convention on Climate Change, FCCC/CP/2013/10/Add.1 2014.  
688 Approaches to address loss and damage associated with climate change impacts in developing countries  
689 particularly vulnerable to the adverse effects of climate change.  
690 [http://unfccc.int/adaptation/workstreams/loss\\_and\\_damage](http://unfccc.int/adaptation/workstreams/loss_and_damage), access: 2017, 2017.

691 UNCLOS: United Nations Convention on the Law of the Sea (UNCLOS), PART XII: Protection and  
692 Preservation of the Marine Environment: Article 194: Measures to prevent, reduce and control pollution of the  
693 marine environment, 1982a.

694 UNCLOS: Article 206: Assessment of potential effects of activities, United Nations Convention on the Law of  
695 the Sea (UNCLOS), 1982b.

696 UNEP: Washington Declaration on Protection of the Marine Environment from Land-Based Activities United  
697 Nations Environment Programme, 1995.

698 UNEP: Progress in implementation of the Global Programme of Action for the Protection of the Marine  
699 Environment from Land-Based Activities (GPA) and specifically the Manila Declaration, United Nations  
700 Environment Programme, UNEP/WBRS.17/5/Rev.1, 2015.

701 UNFCCC: United Nations Framework Convention on Climate Change, entered into force 1994, 1992a.

702 UNFCCC: ARTICLE 4 – COMMITMENTS, United Nations Framework Convention on Climate Change,  
703 1992b.

704 UNFCCC: Decision 1/CP.16: The Cancun Agreements: Outcome of the work of the Ad Hoc Working Group on  
705 Long-term Cooperative Action under the Convention, United Nations Framework Convention on Climate  
706 Change, FCCC/CP/2010/7/Add.1 2010.

707 UNFCCC: Paris Agreement, 12 December 2015, Paris, 2015a.

708 UNFCCC: Report on the structured expert dialogue on the 2013–2015 review: Note by the co-facilitators of the  
709 structured expert dialogue, United Nations Framework Convention on Climate Change, FCCC/SB/2015/INF.1,  
710 2015b.

711 UNFSA: Agreement for the Implementation of the Provisions of the United Nations Convention on the Law of  
712 the Sea of 10 December 1982 relating to the Conservation and Management of Straddling Fish Stocks and  
713 Highly Migratory Fish Stocks, PART II: Conservation and Management of Straddling Fish Stocks and Highly  
714 Migratory Fish Stocks: Article 5: General Principles: (f), 1995.

715 UNGA: Sixty-first session: Agenda item 71 (a): Oceans and the law of the sea A/61/L.30, 2006.

716

717

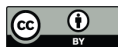

718 The Author declares no competing interests.

719

720 The author would like to acknowledge funding for her research provided by an Australian Post-

721 Graduate Award.
